# Supplementary material
Source: Springer Nature journal article supplement (https://www.springermedizin.de/resource/supplementary/12883_2009_314_MOESM5_ESM.pdf/9455134)

Heart Failure probability (%)

100  
80  
60  
40  
20  
0

5

10

15

20

25

Time (months)

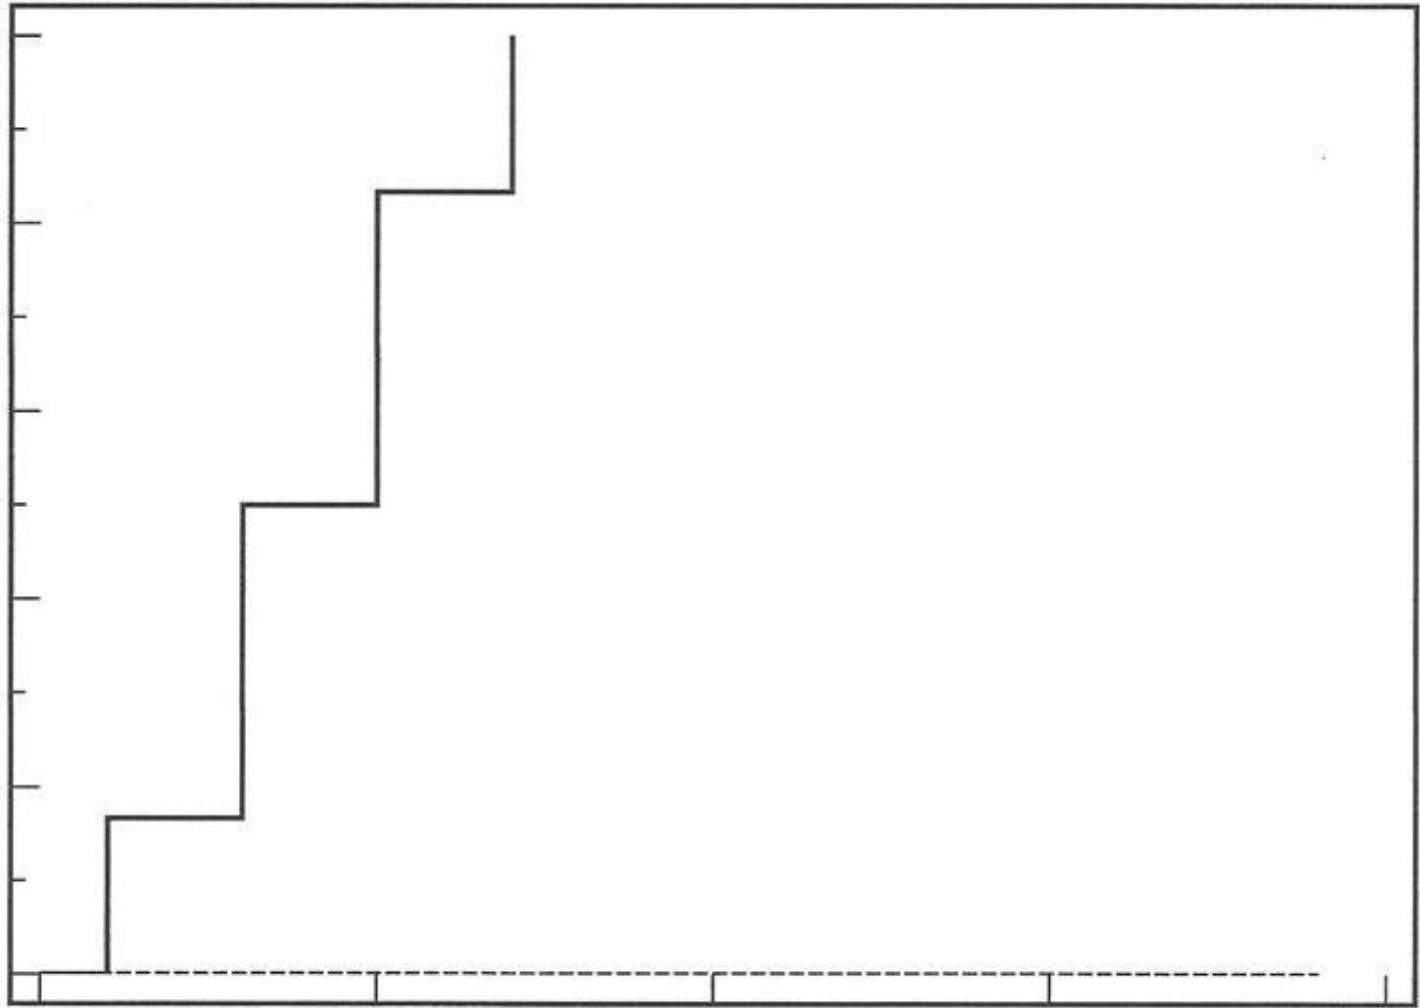

Supplement: MOESM5 [file 9455134]
